# Supplementary material for: Intellectual Capital and Performance of Banking and Financial Institutions in Panama: An Application of the VAIC™ Model
Source: Preprints.org preprint supplement (doi:10.20944/preprints202407.0899.v1), 2024-07-11
Supplement: Supplementary file 1 [file supplementary]

# CERTIFICATE OF ENGLISH EDITING

This document certifies that the paper listed below has been edited to ensure that the language is clear and free of errors. The logical presentation of ideas and the structure of the paper were also checked during the editing process. The edit was performed by professional editors at Editage, a division of Cactus Communications, in cooperation with Taylor & Francis Group. The intent of the author's message was not altered in any way during the editing process. The quality of the edit has been guaranteed, with the assumption that our suggested changes have been accepted and have not been further altered without the knowledge of our editors.

## Title

Intellectual capital and performance of banking and financial institutions in  
Panama: An application of the VAIC™ Model

## Authors

Oriana Jannett Pitre-Cedeño, Edila Eudemia Herrera-Rodríguez

## Order No.

EDHER\_4

**EDITINGSERVICES**  
Supporting Taylor & Francis authors

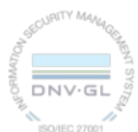

**editage**

Signature

A stylized handwritten signature in black ink, appearing to read 'Prabh Grewal', is written over a faint, light blue 'editage' watermark.

Prabh Grewal,  
Senior Vice President,  
Editage

Date of Issue  
**July 04, 2024**

**Taylor & Francis Editing Services**

[www.tandfedatingservices.com](http://www.tandfedatingservices.com)  
[support@tandfedatingservices.com](mailto:support@tandfedatingservices.com)
